# Supplementary figures and images for: eIF5A-Independent Role of DHPS in p21CIP1 and Cell Fate Regulation
Source: MDPI journal article supplement (doi:10.3390/ijms222413187), 2021-12-07

# Supplemental Materials:

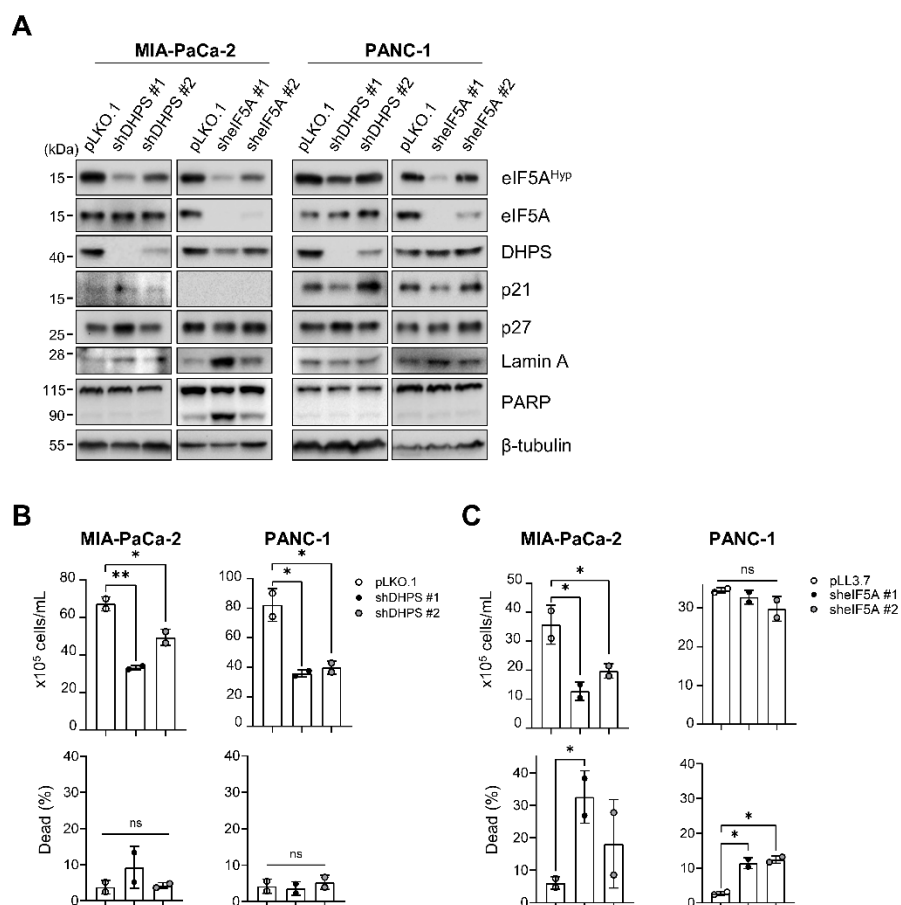

Supplement: s1 [file s1]
